# Supplementary material
Source: ML conference proceedings conference paper supplement (https://openreview.net/forum?id=072P11r1wu)

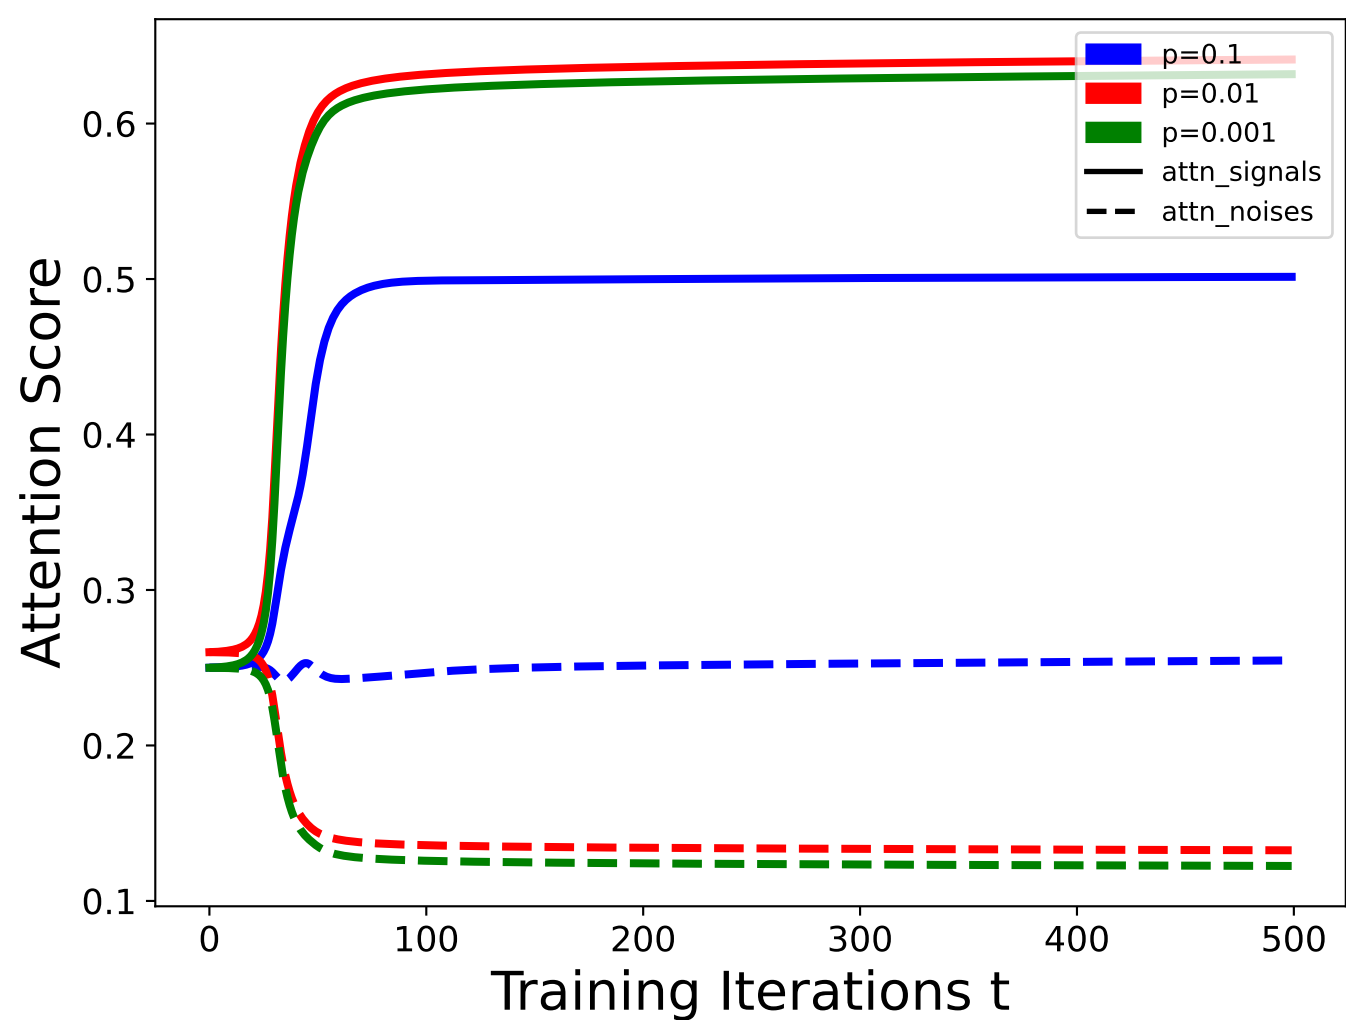

Supplement: supplementary_material [file attn-checkpoint.pdf › TRM_dynamics_supplementary_material/Code/part1/overfiting/.ipynb_checkpoints/attn-checkpoint.pdf]
