# Supplementary material
Source: ML conference proceedings conference paper supplement (https://openreview.net/forum?id=072P11r1wu)

Numerical Comparison between Theoretical Upper Bound and Experimental Loss

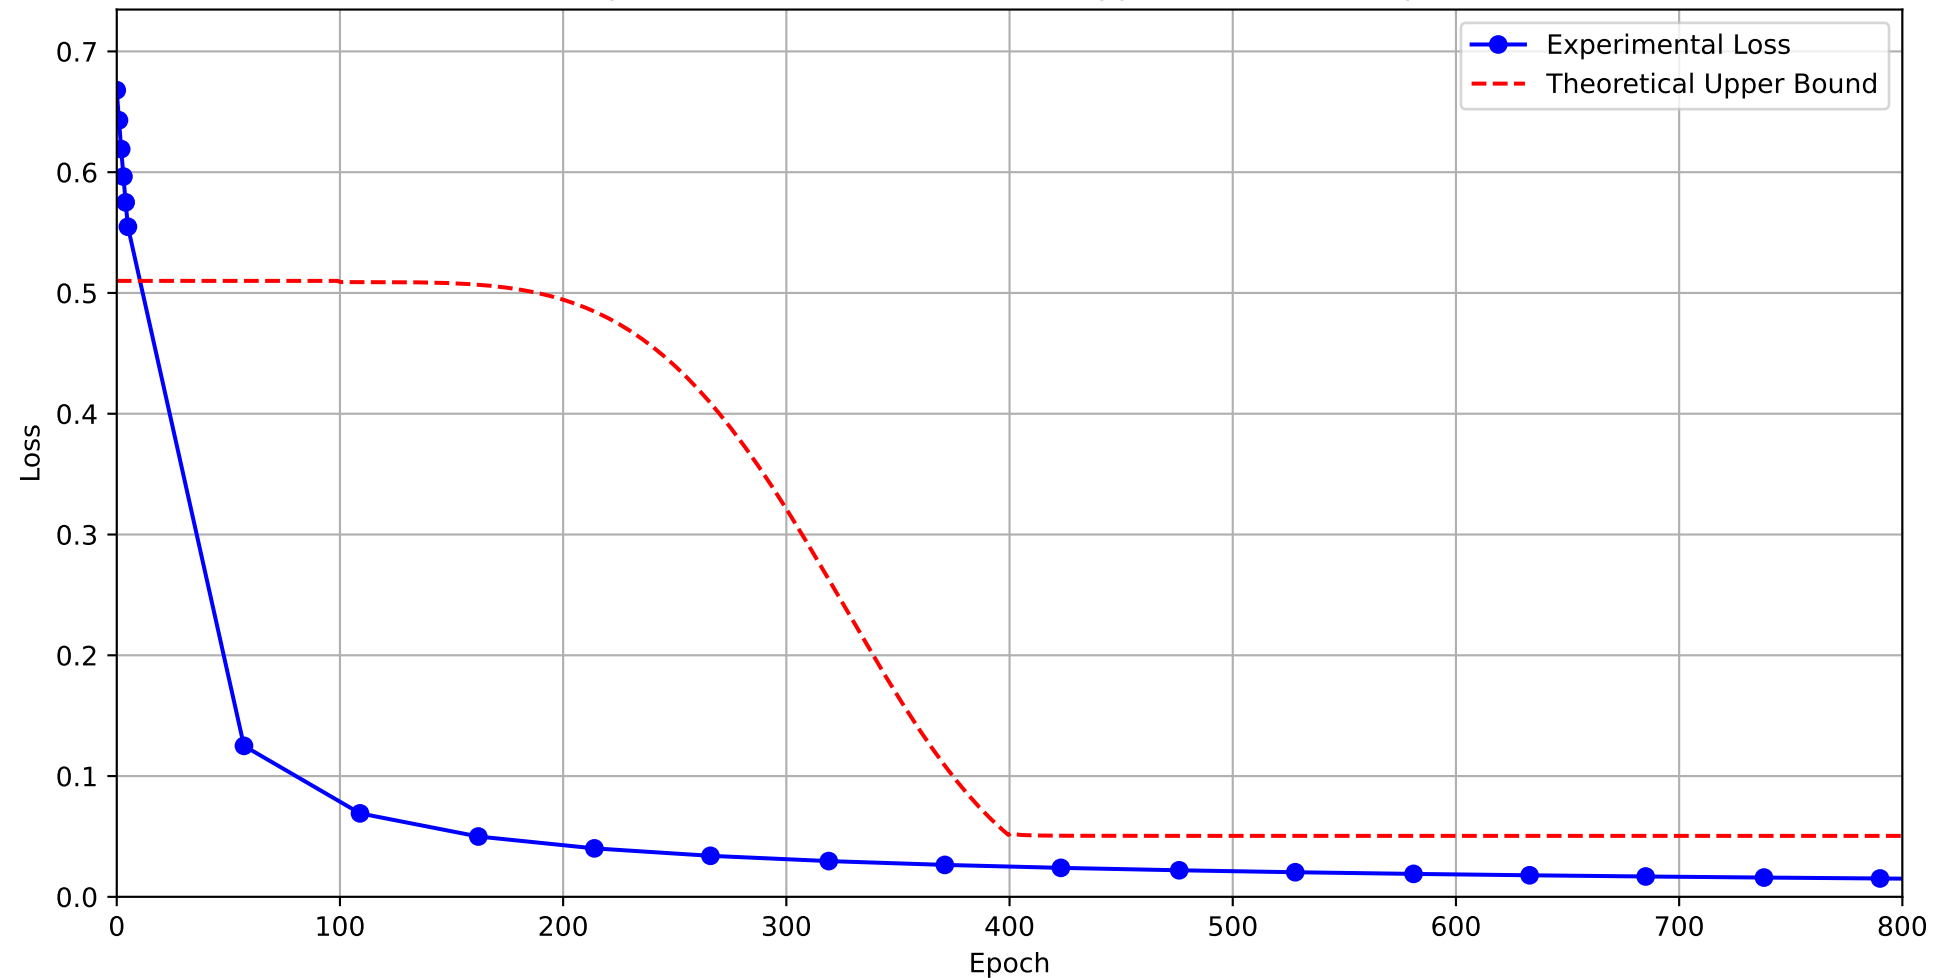

Supplement: supplementary_material [file Comparison-checkpoint.pdf › TRM_dynamics_supplementary_material/Code/补充实验/分界线/.ipynb_checkpoints/Comparison-checkpoint.pdf]
