# Supplementary material
Source: ML conference proceedings conference paper supplement (https://openreview.net/forum?id=072P11r1wu)

Initialize variance  $\sigma$

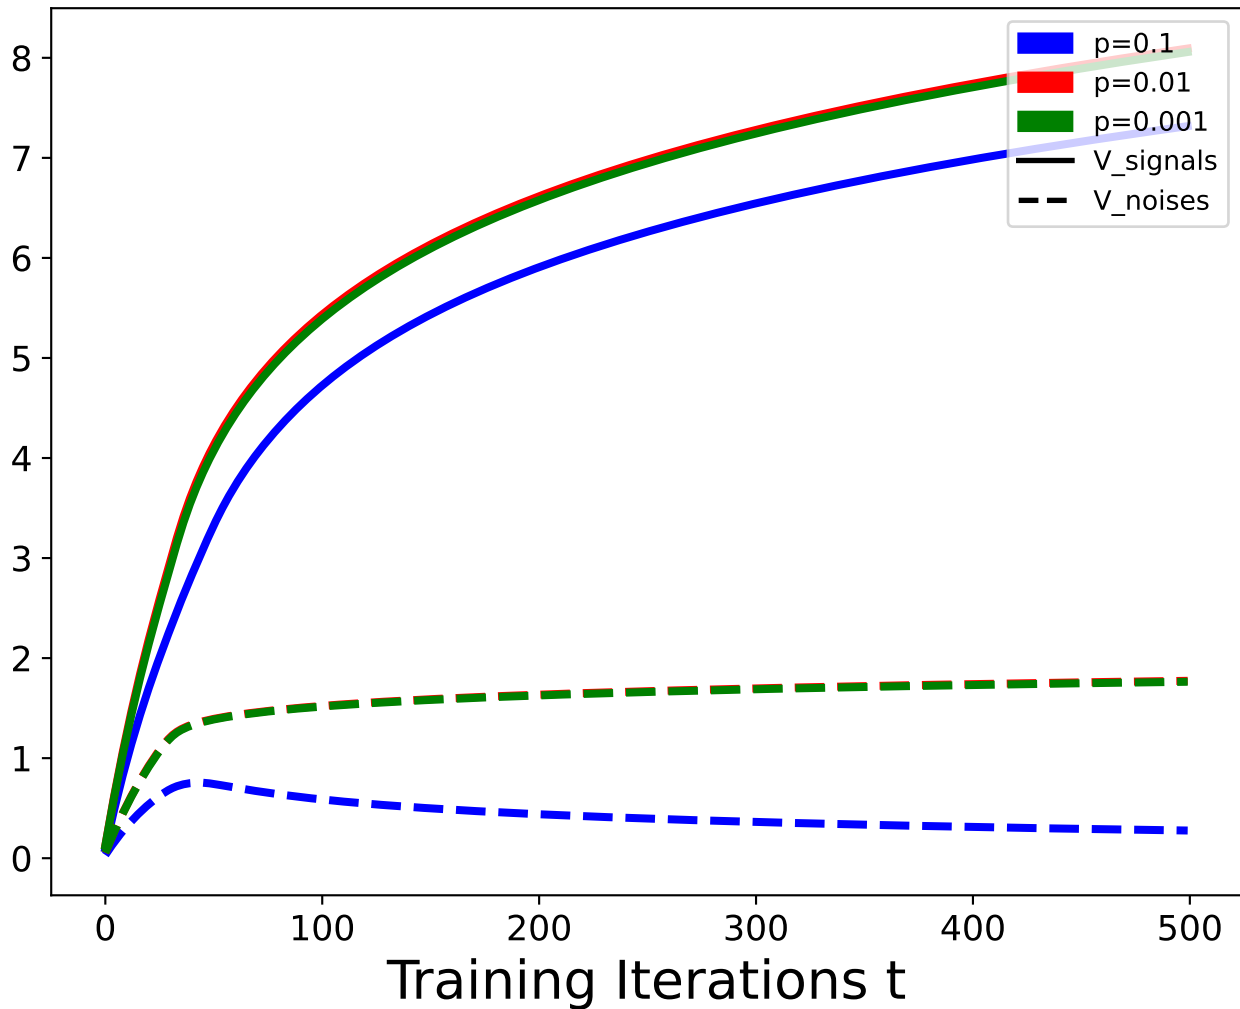

Supplement: supplementary_material [file V-checkpoint.pdf › TRM_dynamics_supplementary_material/Code/part1/overfiting/.ipynb_checkpoints/V-checkpoint.pdf]
