# Supplementary material
Source: ML conference proceedings conference paper supplement (https://openreview.net/forum?id=072P11r1wu)

The impact of different Noise on Test loss

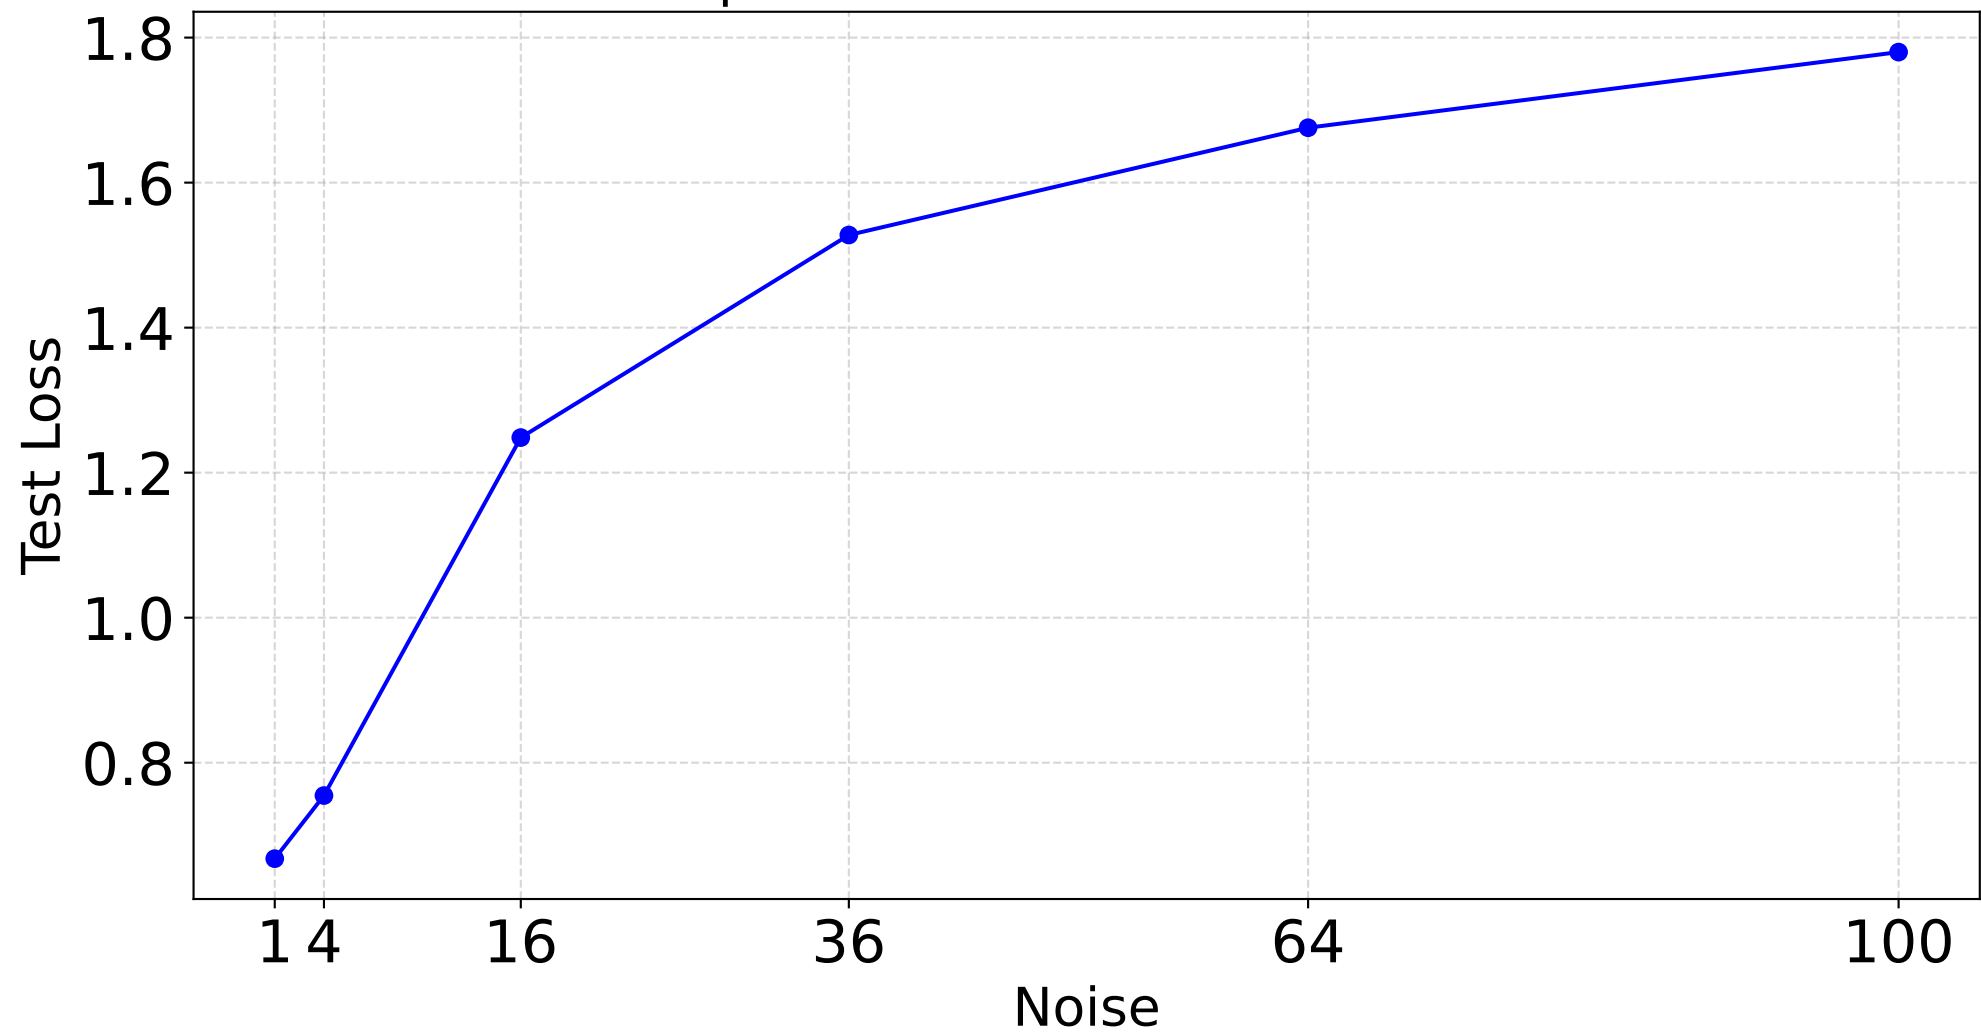

Supplement: supplementary_material [file V-checkpoint.pdf › TRM_dynamics_supplementary_material/Code/补充实验/真实数据实验/.ipynb_checkpoints/V-checkpoint.pdf]
