# Supplementary material
Source: ML conference proceedings conference paper supplement (https://openreview.net/forum?id=072P11r1wu)

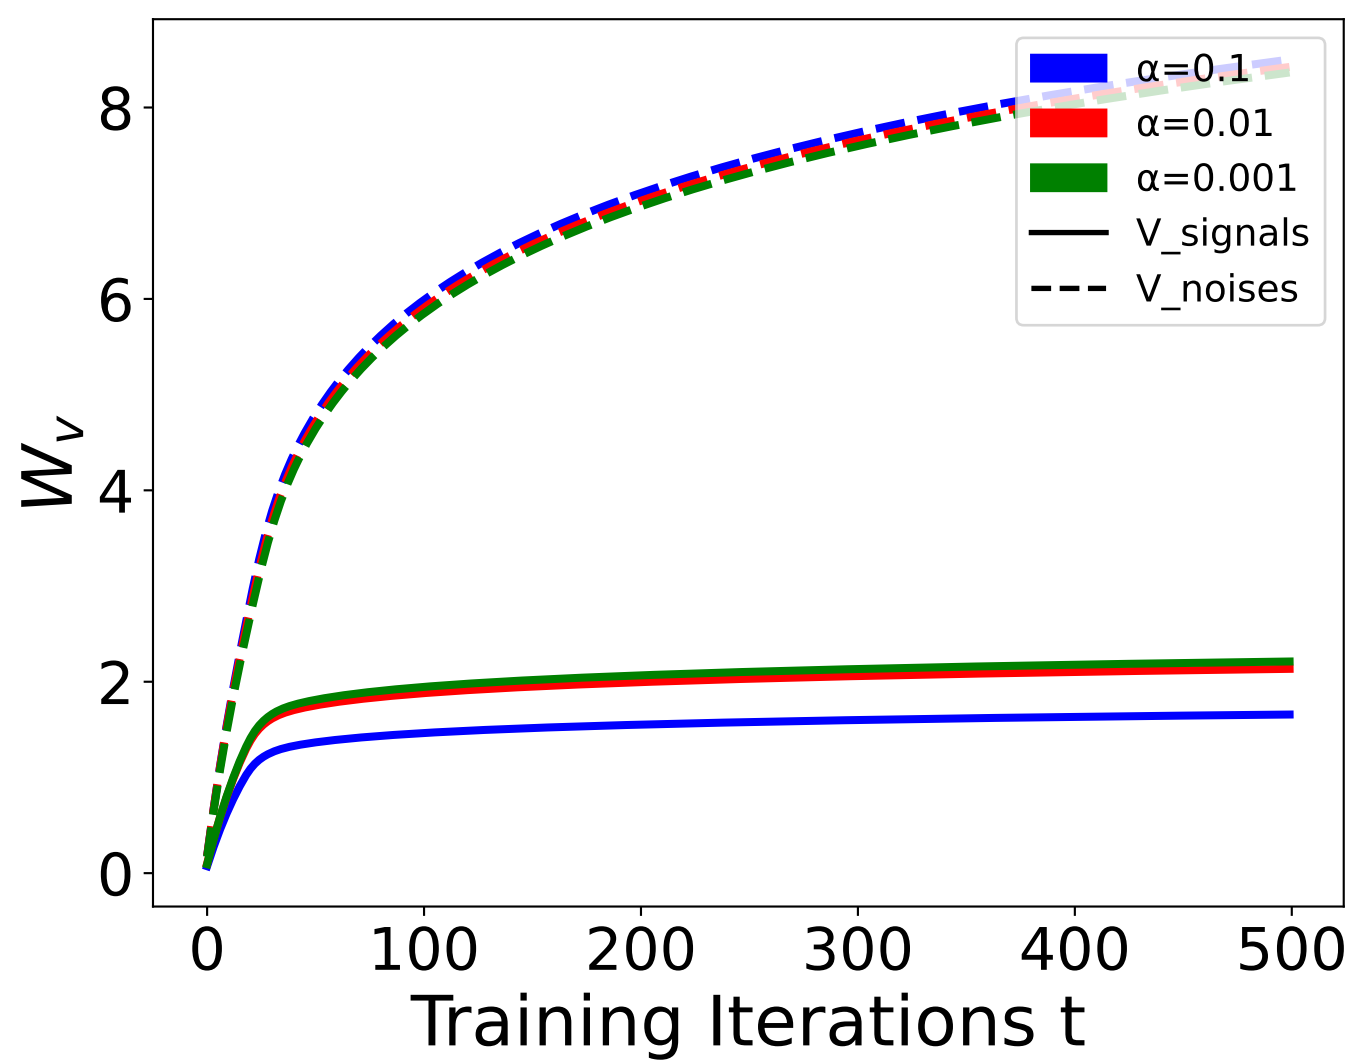

Supplement: supplementary_material [file harm_V.pdf › TRM_dynamics_supplementary_material/Code/part1/harm/harm_V.pdf]

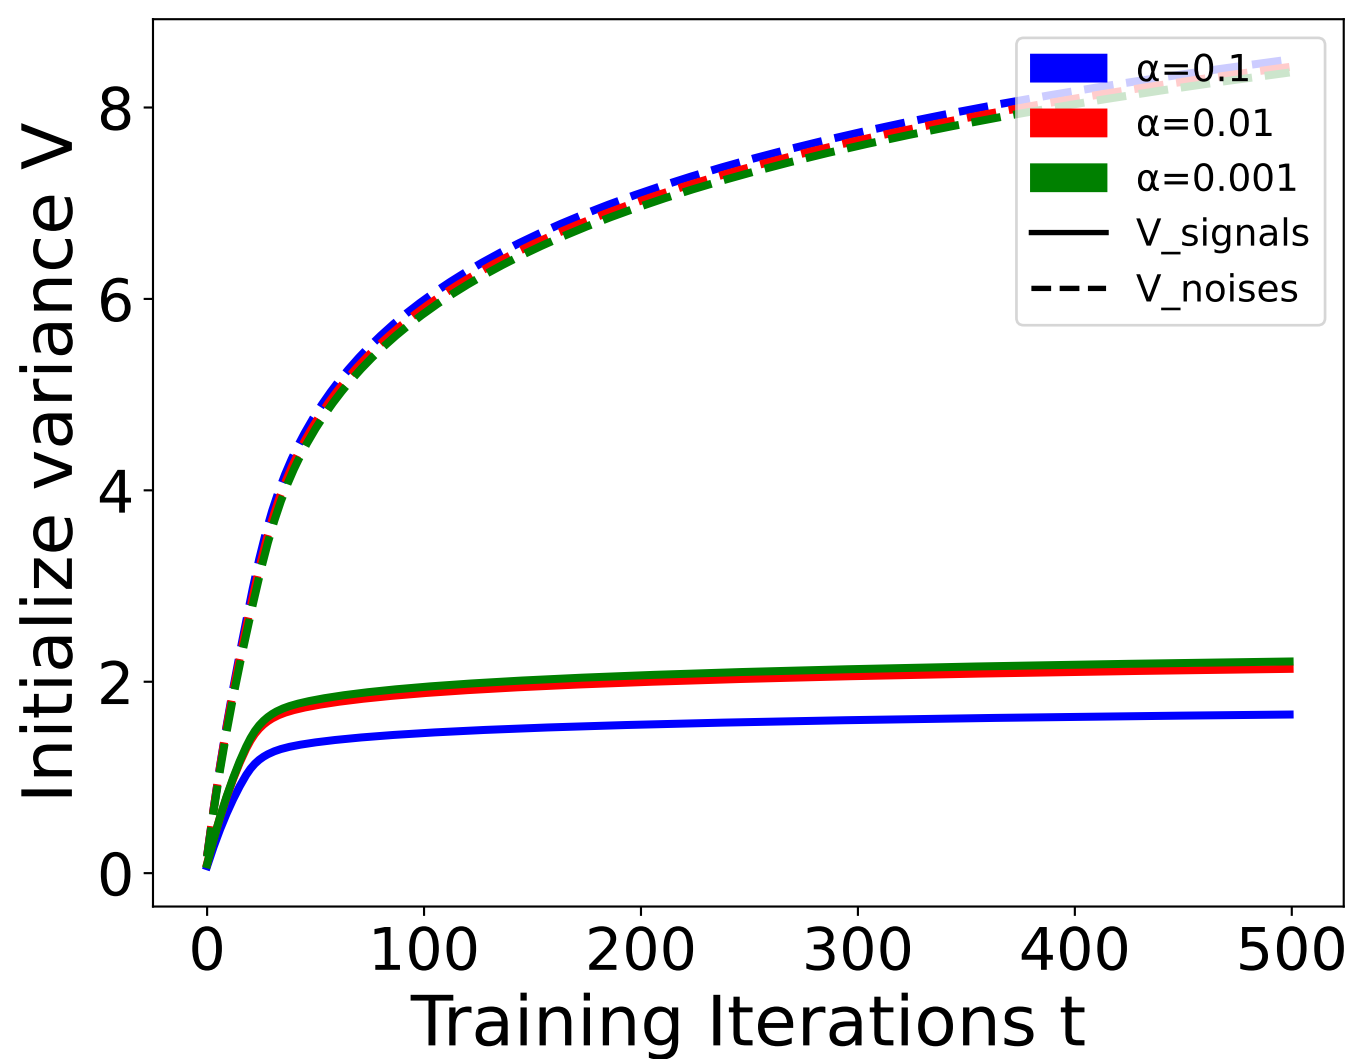

Supplement: supplementary_material [file harm_attn.pdf › TRM_dynamics_supplementary_material/Code/part1/harm/harm_attn.pdf]

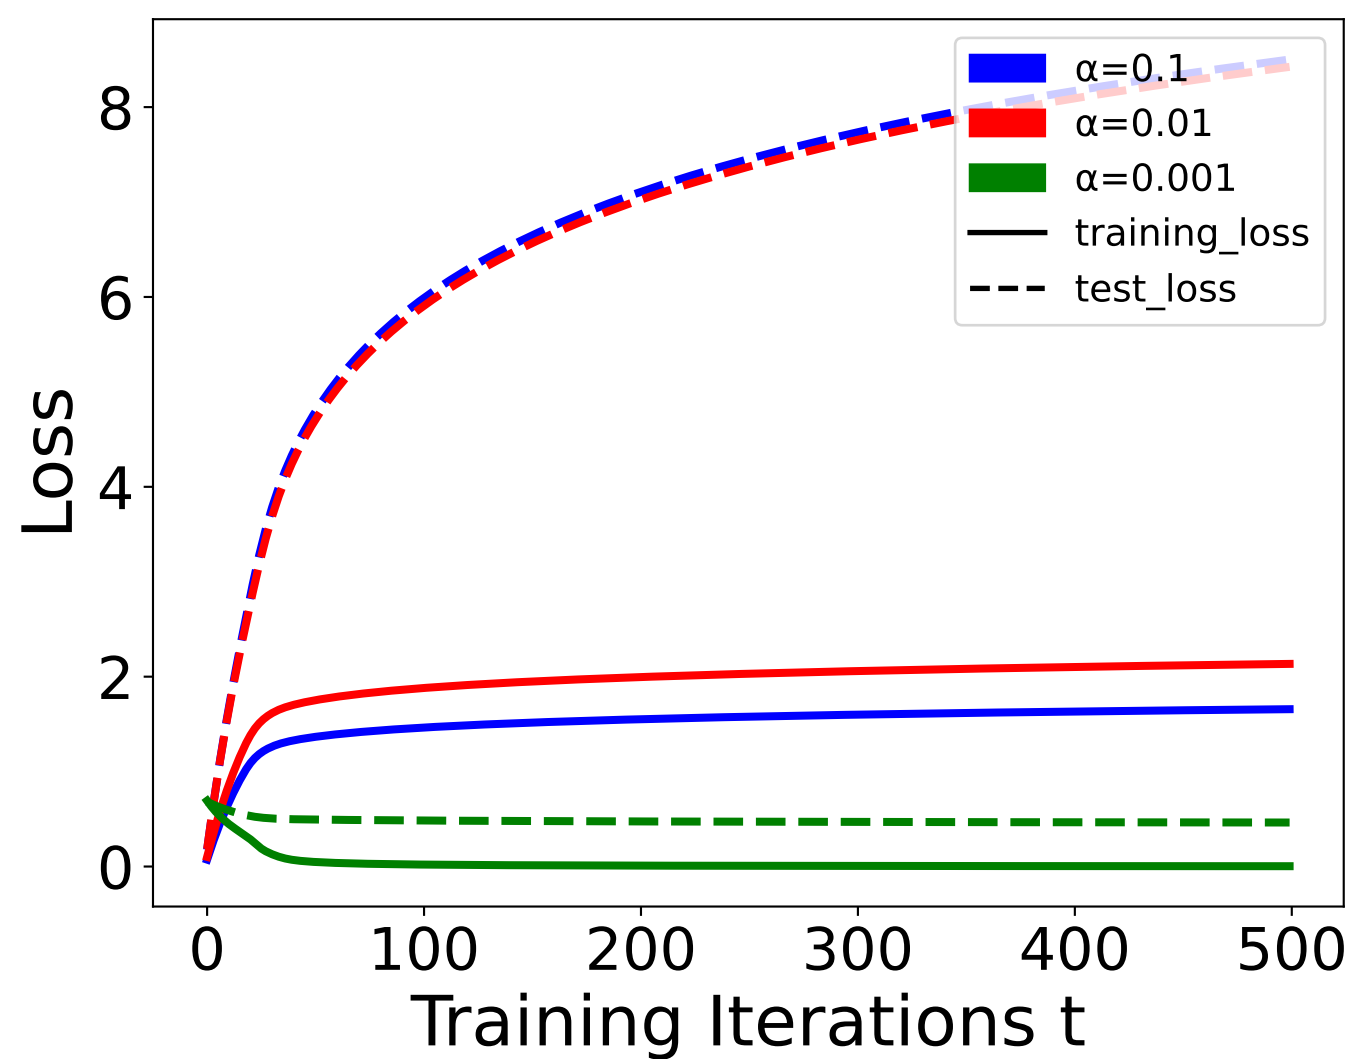

Supplement: supplementary_material [file harm_loss.pdf › TRM_dynamics_supplementary_material/Code/part1/harm/harm_loss.pdf]

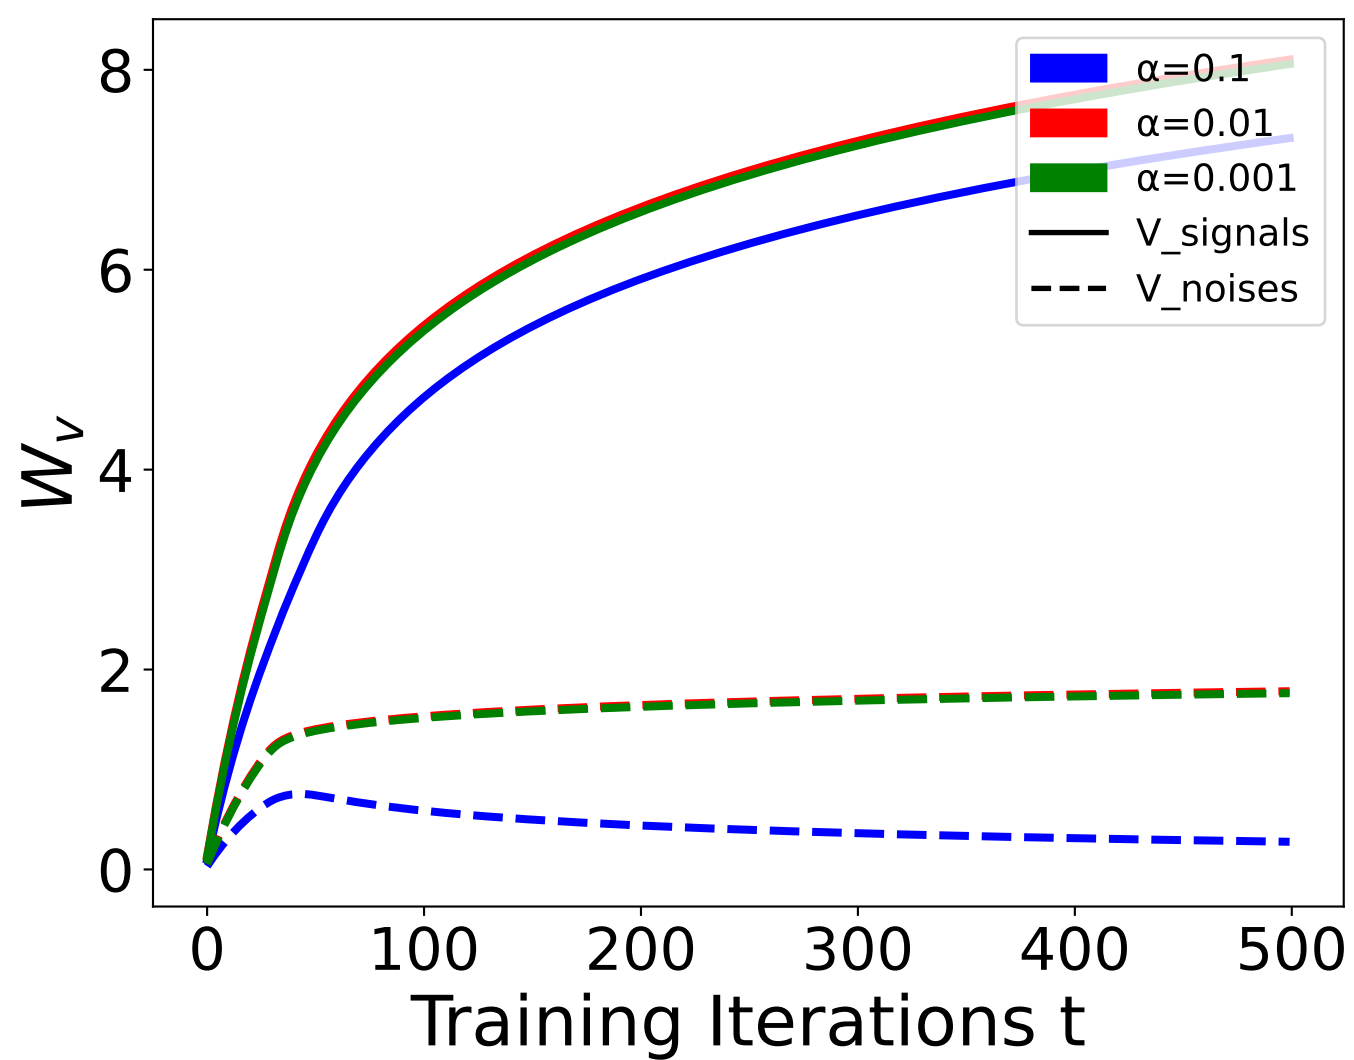

Supplement: supplementary_material [file V.pdf › TRM_dynamics_supplementary_material/Code/part1/overfiting/V.pdf]

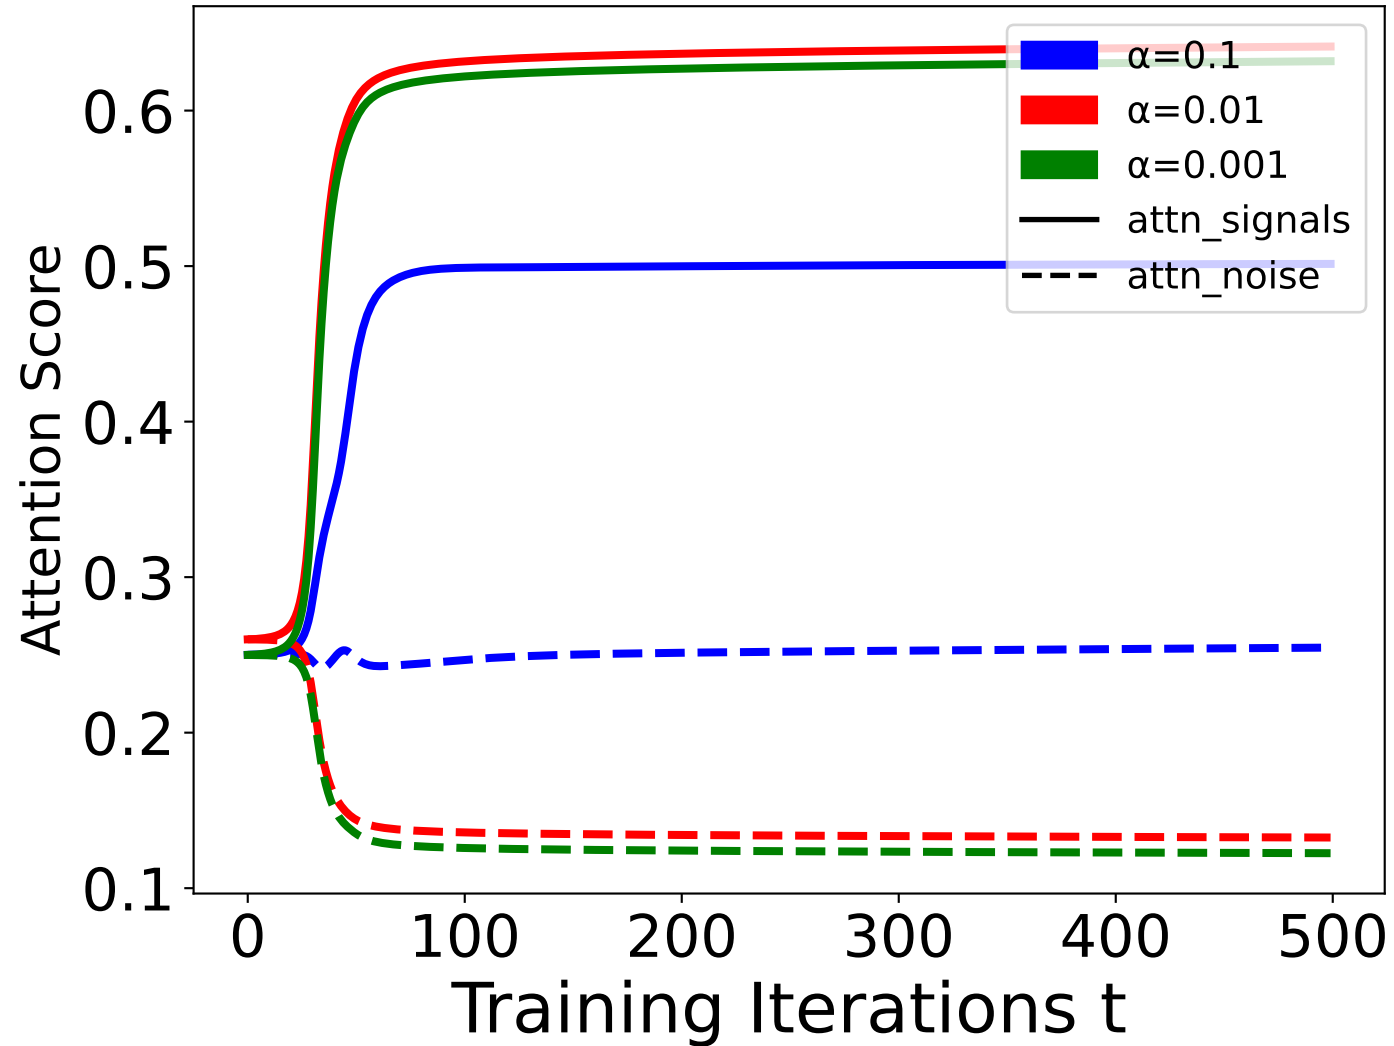

Supplement: supplementary_material [file attn.pdf › TRM_dynamics_supplementary_material/Code/part1/overfiting/attn.pdf]

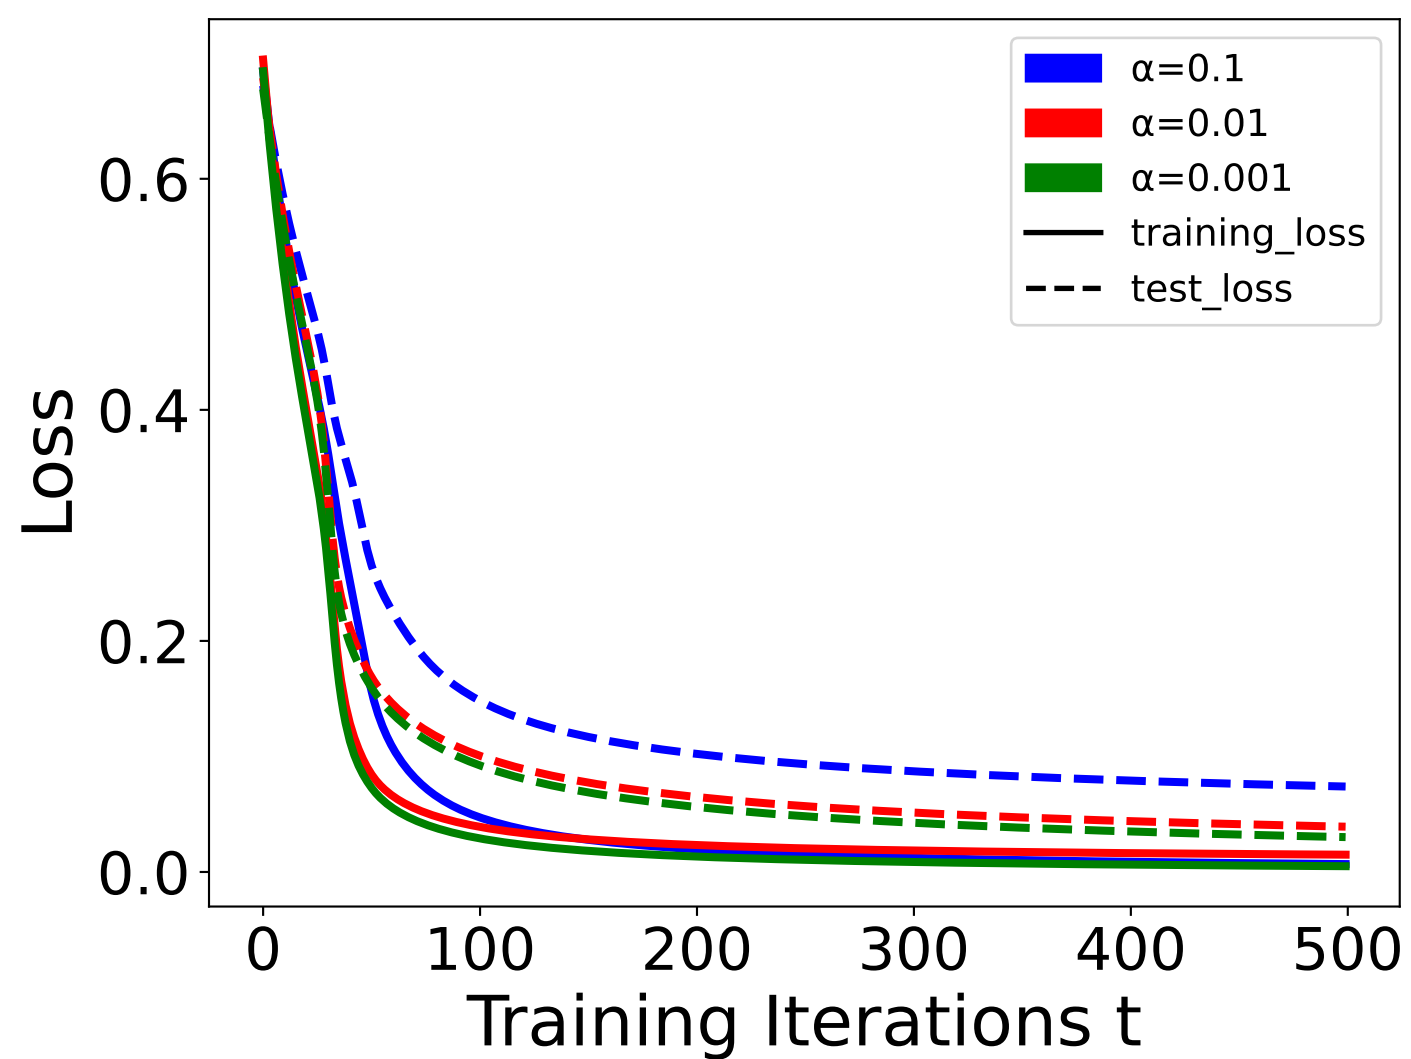

Supplement: supplementary_material [file loss.pdf › TRM_dynamics_supplementary_material/Code/part1/overfiting/loss.pdf]

Numerical Comparison between Theoretical Upper Bound and Experimental Loss

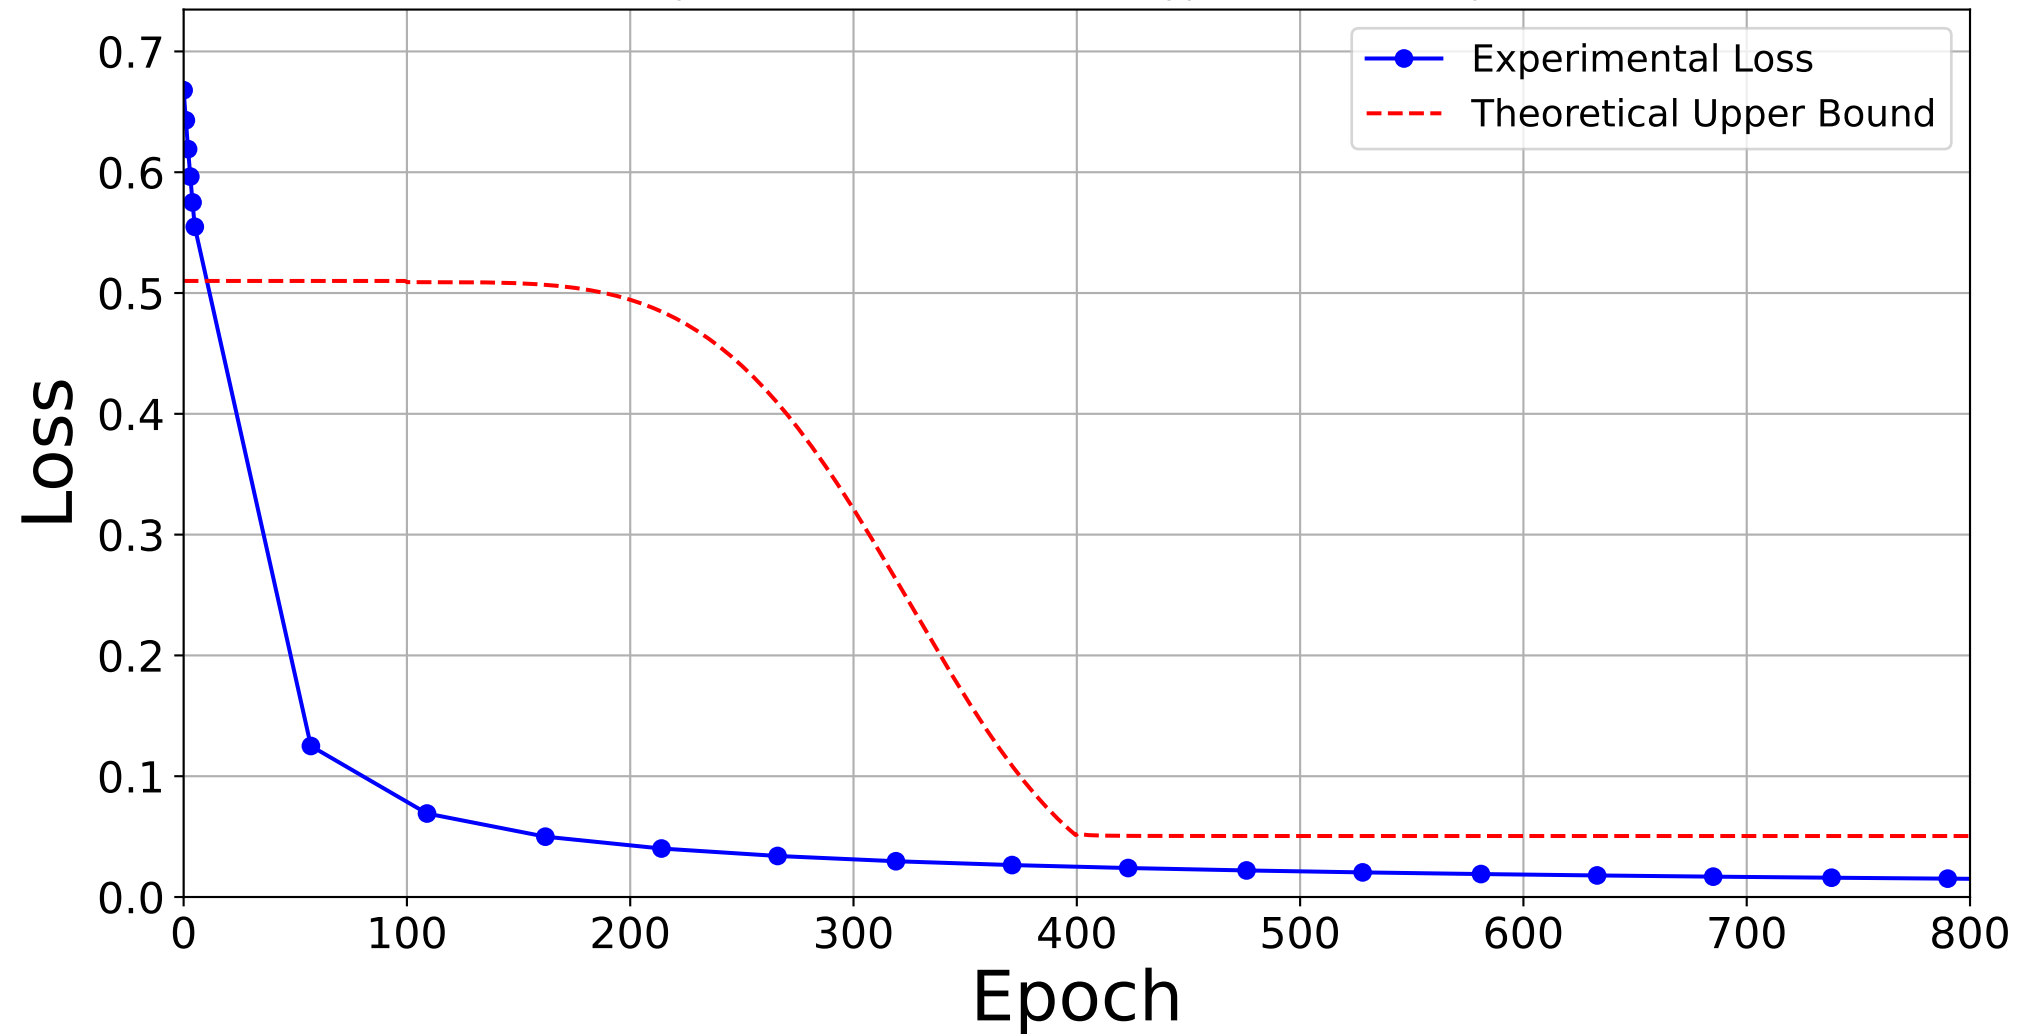

Supplement: supplementary_material [file Comparison.pdf › TRM_dynamics_supplementary_material/Code/补充实验/分界线/Comparison.pdf]

Numerical comparison between theoretical upper bound and experimental loss

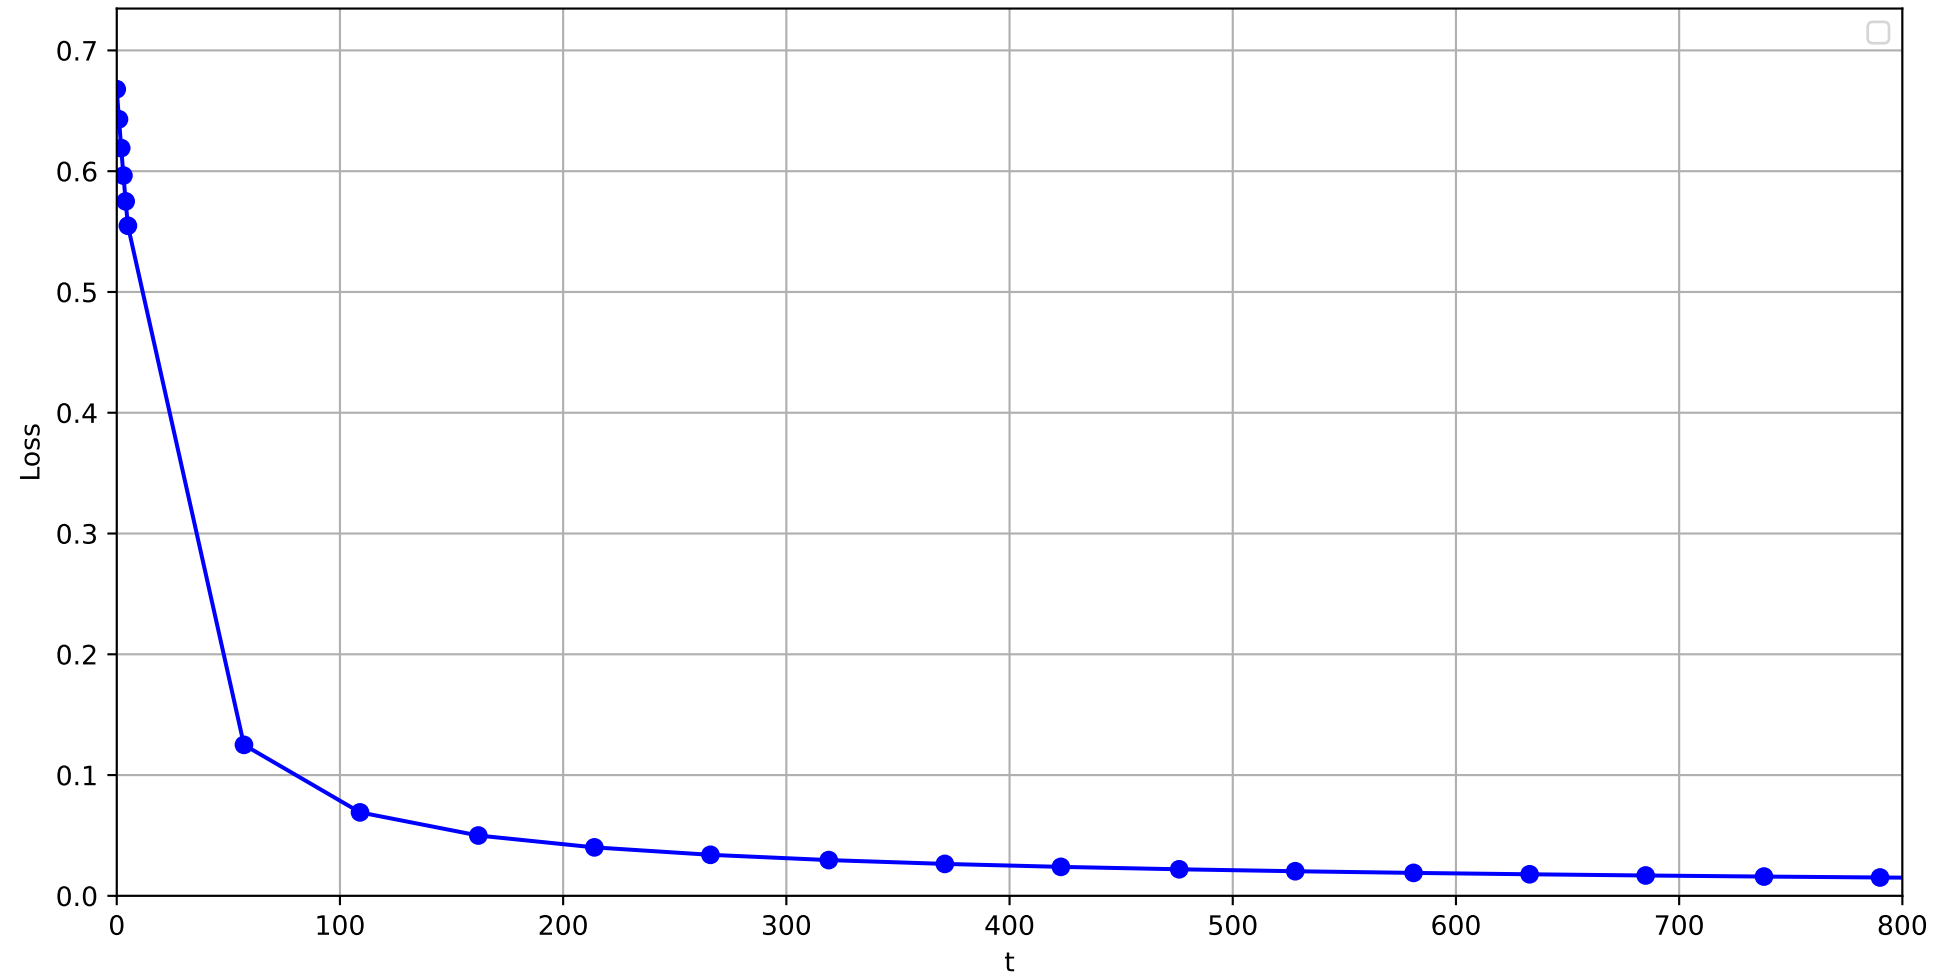

Supplement: supplementary_material [file 分界线.pdf › TRM_dynamics_supplementary_material/Code/补充实验/分界线/分界线.pdf]

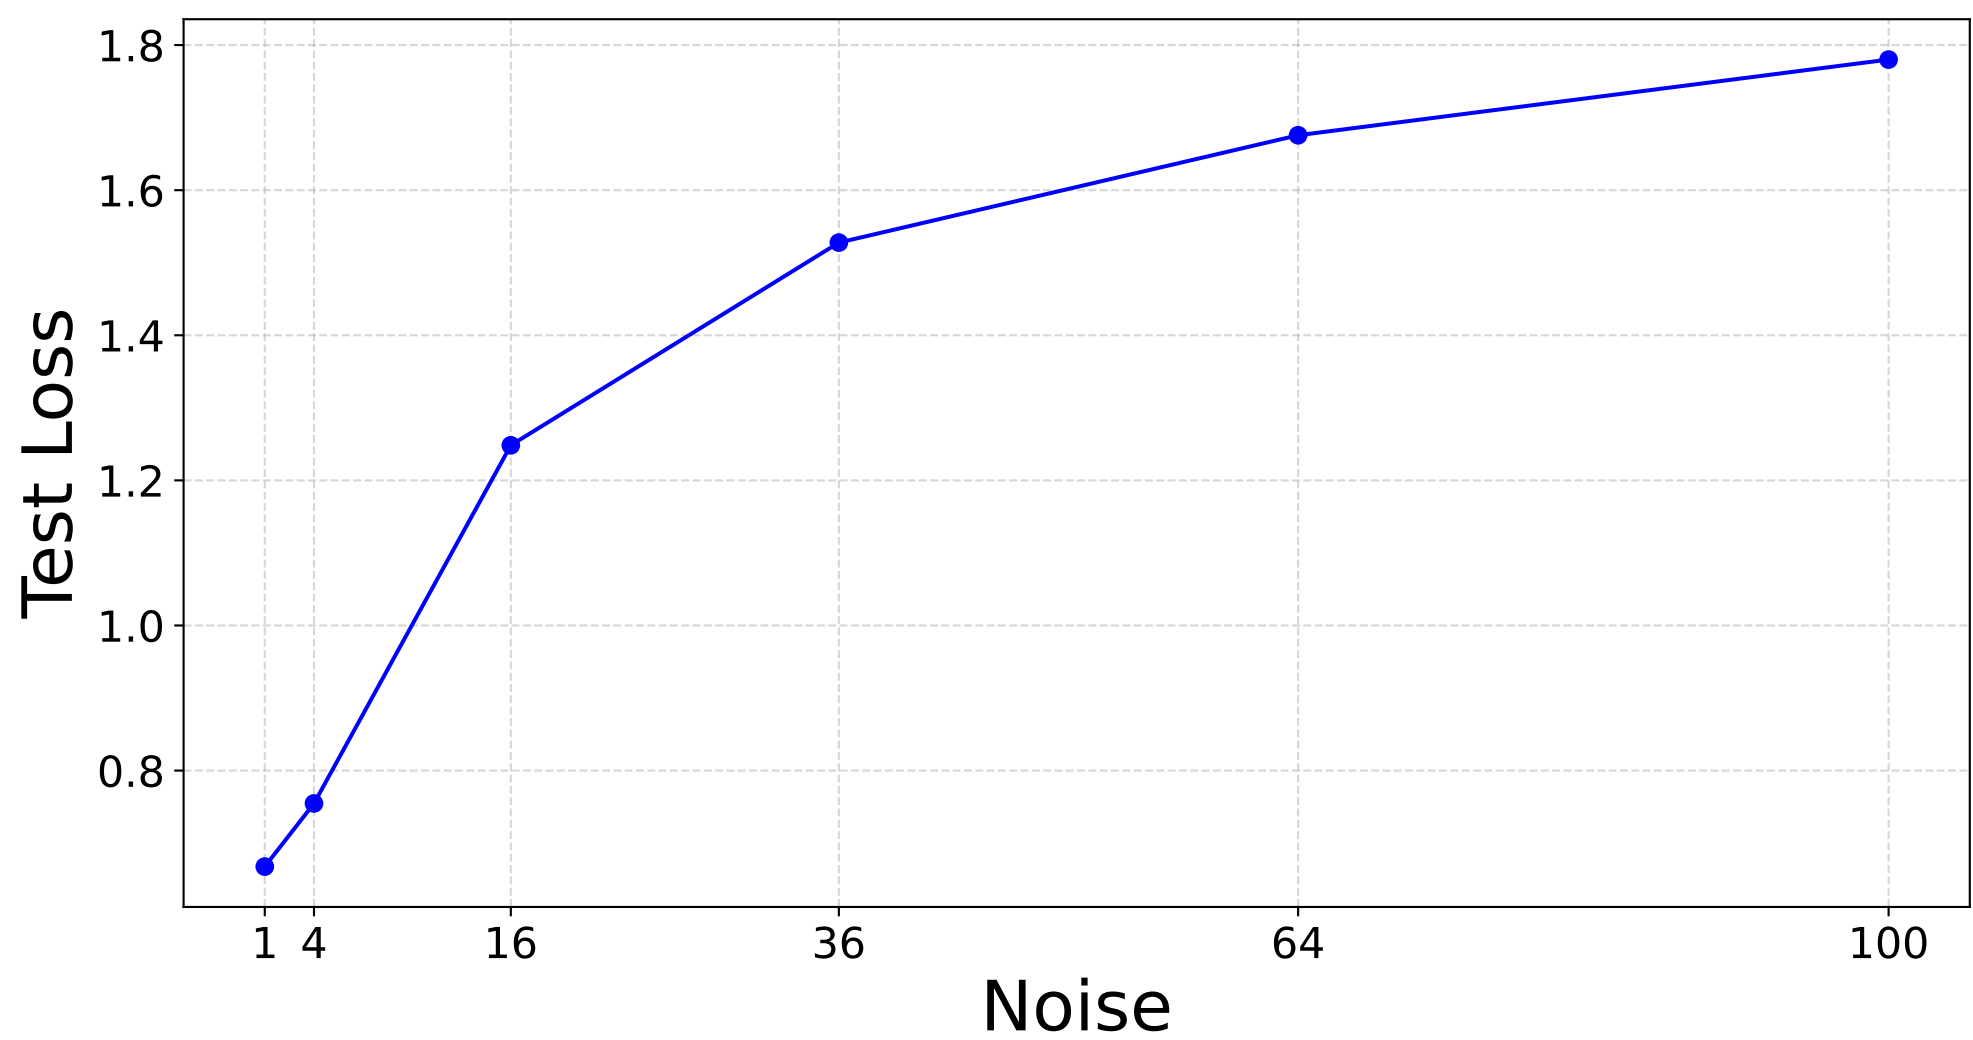

Supplement: supplementary_material [file V.pdf › TRM_dynamics_supplementary_material/Code/补充实验/真实数据实验/V.pdf]
